# Supplementary material for: Mycobacterium leprae genomes from naturally infected nonhuman primates
Source: PLoS Negl Trop Dis. 2018 Jan 30;12(1):e0006190. doi: 10.1371/journal.pntd.0006190 (PMC5790234; doi:10.1371/journal.pntd.0006190)
Supplement: S1 Table — (XLSX) [file pntd.0006190.s001.xlsx]

## Sheet: S1 Table
S1 Table. Case details of the three nonhuman primates included in this study.
M. leprae strain	Host species	Location of capture	Year of capture	Age at capture	Location of captivity	Year of onset of leprosy symptoms	Type of leprosy	Sample acquired for this study
Ch4	Chimpanzee	Sierra Leone	1980	2 years	Japan	2009	Lepromatous	DNA extracted from skin biopsy sample
SM1	Sooty mangabey	West Africaa	1975	5 years	USA	1979	Lepromatous - borderline lepromatous	M. leprae DNA extracted after purification of the strain through passage in armadillo
CM1	Cynomolgus macaque	The Philippines	1990	7 years	USA	1994	Borderline - borderline	Skin biopsy sample preserved in a formalin-fixed paraffin-embedded form since 1994
a The exact location from where the sooty mangabey was captured is unknown, but the animal was shipped from a facility in Nigeria.
